# Supplementary material
Source: Springer Nature journal article supplement (https://www.springermedizin.de/resource/supplementary/12936_2013_2819_MOESM4_ESM.pdf/9544346)

*P. falciparum*

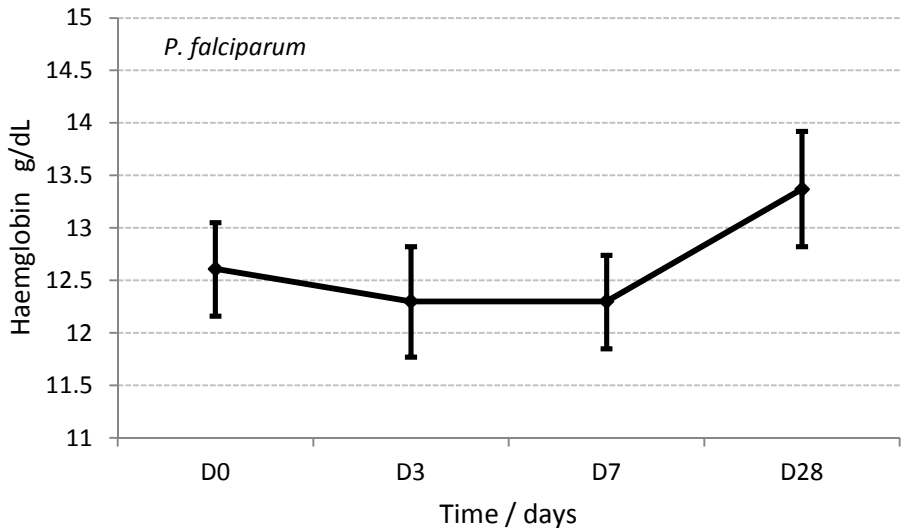

*P. vivax*

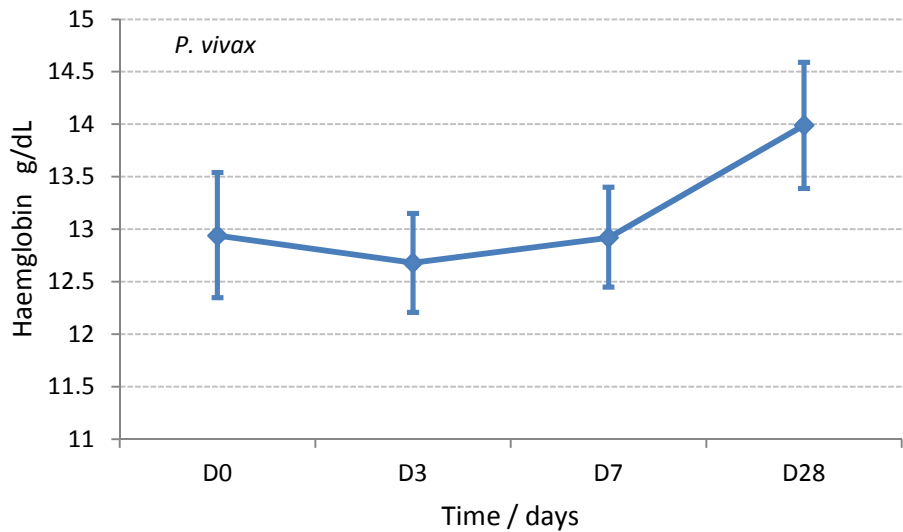

Supplement: MOESM4 [file 9544346]
